# Supplementary material for: Vector Competence of Mosquitoes from Germany for Sindbis Virus
Source: MDPI journal article supplement (doi:10.3390/v14122644), 2022-11-26
Supplement: s1 [file s1]

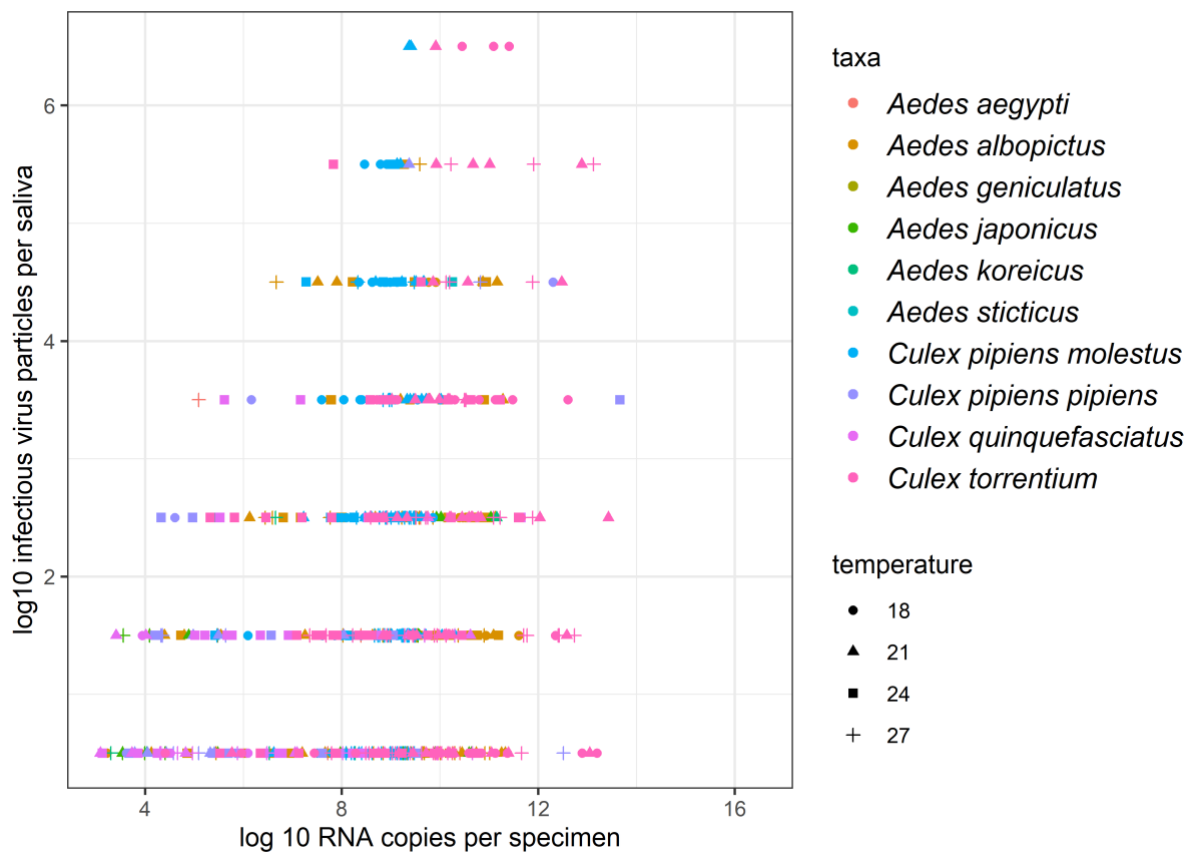

**Additional File 1, Figure S1.** Relationship between body titers and saliva titers per specimen.

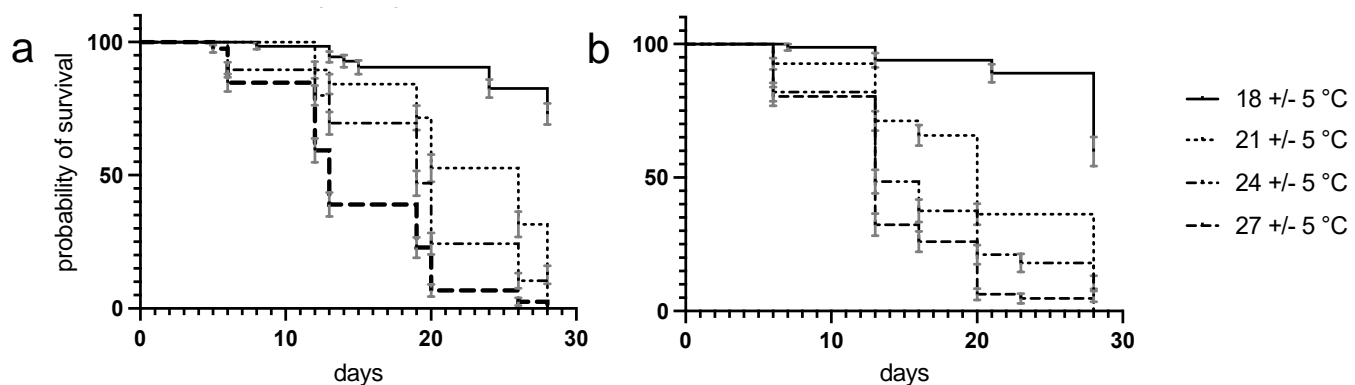

**Additional file 2, Figure S2.** Survival of (a) uninfected and (b) SINV infected *Cx. pip.* biotype *molestus* mosquitoes depending on incubation temperature for 28 days after blood feed. Number of alive mosquitoes was counted once a week. Significance was tested by log-rank (Mantel-Cox) test, standard error is shown in the graph (grey). (a) 18 +/- 5 °C n = 126; 21 +/- 5 °C n = 95; 24 +/- 5 °C n = 115; 27 +/- 5 °C n = 118. 18 +/- 5 °C vs. 21 +/- 5 °C: df = 1,  $X^2 = 25.75$ . 18 +/- 5 °C vs. 24 +/- 5 °C: df = 1,  $X^2 = 167.6$ . 18 +/- 5 °C vs. 27 +/- 5 °C: df = 1,  $X^2 = 209.9$ . 21 +/- 5 °C vs. 24 +/- 5 °C: df = 1,  $X^2 = 25.75$ . 21 +/- 5 °C vs. 27 +/- 5 °C: df = 1,  $X^2 = 73.33$ . 24 +/- 5 °C vs. 27 +/- 5 °C: df = 1,  $X^2 = 22.83$ . All temperature profiles are statistically significant different to each other ( $P < 0.0001$ ). (b) 18 +/- 5 °C n = 119; 21 +/- 5 °C n = 149; 24 +/- 5 °C n = 128; 27 +/- 5 °C n = 127. 18 +/- 5 °C vs. 21 +/- 5 °C: df = 1,  $X^2 = 72.06$ . 18 +/- 5 °C vs. 24 +/- 5 °C: df = 1,  $X^2 = 107.8$ . 18 +/- 5 °C vs. 27 +/- 5 °C: df = 1,  $X^2 = 162.7$ . 21 +/- 5 °C vs. 24 +/- 5 °C: df = 1,  $X^2 = 18.18$ . 21 +/- 5 °C vs. 27 +/- 5 °C: df = 1,  $X^2 = 61.31$ . 24 +/- 5 °C vs. 27 +/- 5 °C: df = 1,  $X^2 = 10.10$ . All temperature profiles of SINV infected mosquitoes are statistically significant different to each other ( $P < 0.0001$ ), except 27 +/- 5 °C vs. 24 +/- 5 °C has a lower P-value of 0.0015.

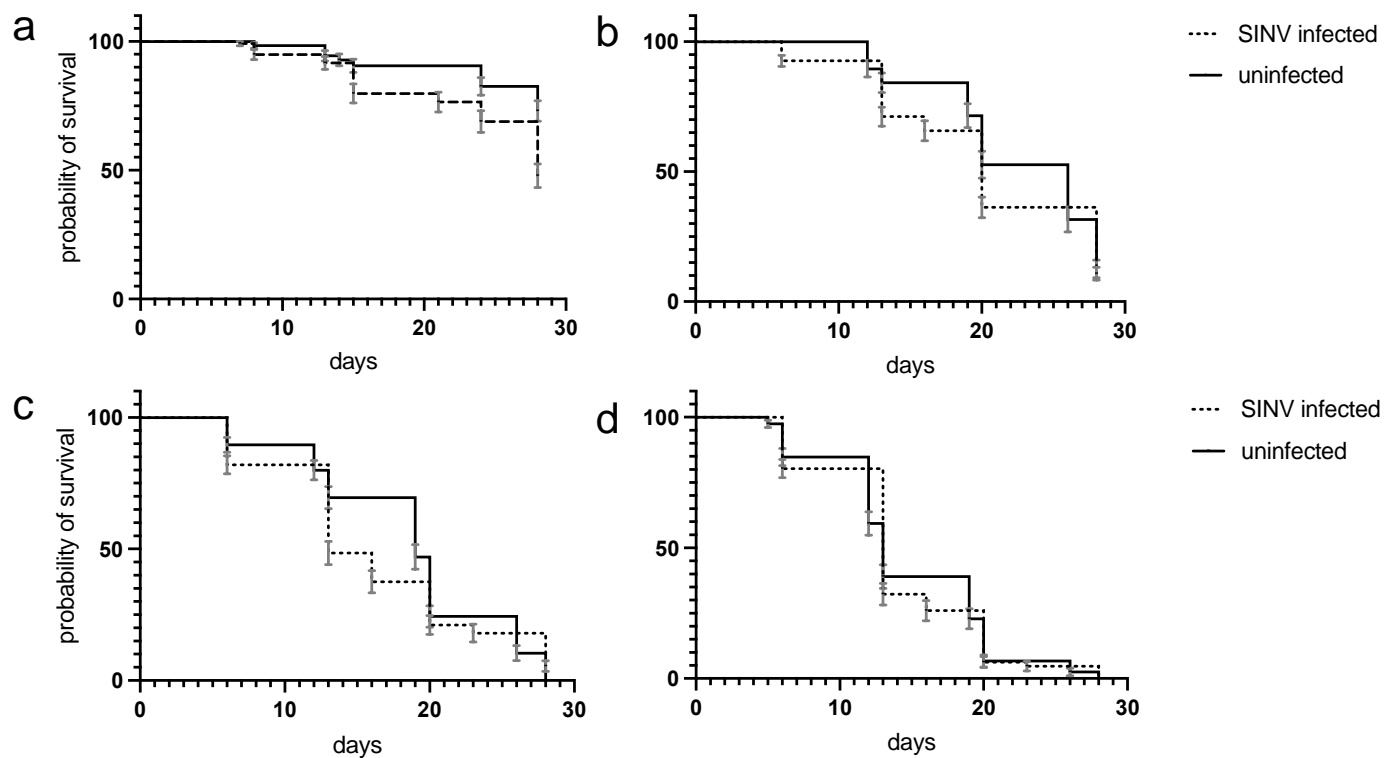

**Additional file 3, Figure S3.** Comparison of the survival of uninfected and SINV infected *Cx. pip. biotype molestus* mosquitoes incubated for 28 days at four different temperatures. Number of alive mosquitoes was counted once a week. Significance was tested by log-rank (Mantel-Cox) test, standard error is shown in the graph (grey). (a) 18 ± 5 °C, uninfected n = 126 and SINV-infected n = 119, df = 1,  $X^2 = 15.51$ ,  $P < 0.0001$ . (b) 21 ± 5 °C, uninfected n = 95 and SINV-infected n = 149, df = 1,  $X^2 = 0.316$ ,  $P = 0.574$ . (c) 24 ± 5 °C, uninfected n = 115 and SINV-infected n = 128, df = 1,  $X^2 = 0.1157$ ,  $P = 0.7337$ . (d) 27 ± 5 °C, uninfected n = 118 and SINV-infected n = 127, df = 1,  $X^2 = 1.063$ ,  $P = 0.3026$ .
